# Supplementary material for: Negative Differential Resistance and Long-Lived Changes in the Electrical Conductivity of Carbon Composites Induced by Electrothermal Effects
Source: MDPI journal article supplement (doi:10.3390/app13021069), 2023-01-13
Supplement: s1 [file s1]

# Negative Differential Resistance and Long-Lived Changes in the Electrical Conductivity of Carbon Composites Induced by Electrothermal Effects

Wrida Ahmed <sup>1</sup>, Lotfi Chouiref <sup>1</sup>, Hassen Dahman <sup>1</sup>, Lassaad El Mir <sup>1</sup> and Henrique L. Gomes <sup>2,\*</sup>

<sup>1</sup> Laboratory of Physics of Materials and Nanomaterials Applied at Environment (LaPhyMNE), Faculty of Sciences in Gabes, Gabes University, Gabes 6072, Tunisia

<sup>2</sup> Instituto de Telecomunicações, Departamento de Engenharia Eletrotécnica e de Computadores, Universidade de Coimbra, 3030-290 Coimbra, Portugal

\* Correspondence: hgomes@uc.pt

## Supplementary Materials

In this supplementary Materials, the conductivity of a sample doped with 5% of ZrO<sub>2</sub> nanoparticles was compared to the conductivity of a sample fabricated using only pyrogallol-formaldehyde (pristine samples). As shown in Figure S1, the sample with ZrO<sub>2</sub> nanoparticles exhibits higher electrical conductivity than the pristine sample.

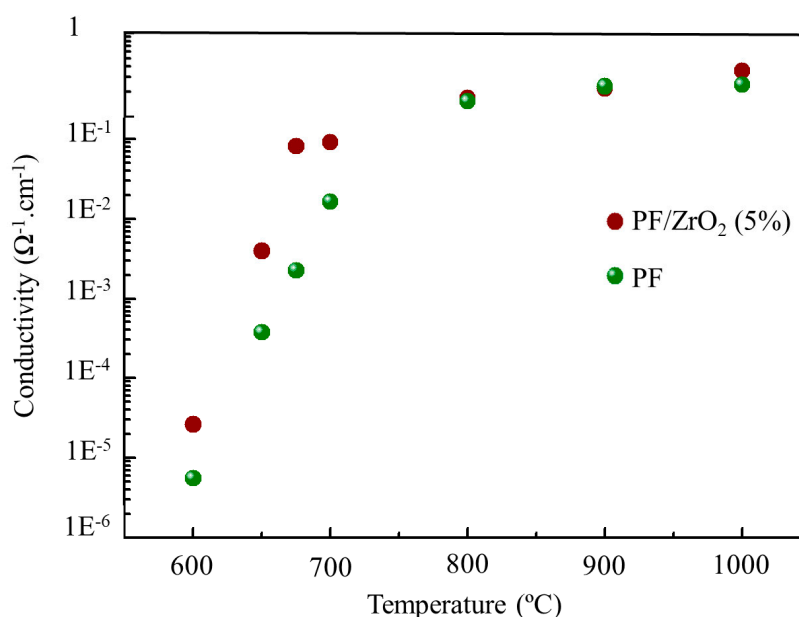

**Citation:** Ahmed, W.; Chouiref, L.; Dahman, H.; El Mir, L.; Gomes, H.L. Negative Differential Resistance and Long-Lived Changes in the Electrical Conductivity of Carbon Composites Induced by Electrothermal Effects. *Appl. Sci.* **2023**, *13*, 1069. <https://doi.org/10.3390/app13021069>

Academic Editor: Vardan Galstyan

Received: 21 November 2022

Revised: 5 January 2023

Accepted: 10 January 2023

Published: 13 January 2023

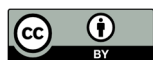

**Copyright:** © 2023 by the authors. Licensee MDPI, Basel, Switzerland. This article is an open access article distributed under the terms and conditions of the Creative Commons Attribution (CC BY) license (<https://creativecommons.org/licenses/by/4.0/>).

**Figure S1.** Comparison between the electrical conductivity of the pyrogallol-formaldehyde sample with the sample doped with 5% of ZrO<sub>2</sub> nanoparticles. The conductivity was measured for several pyrolysis temperatures.

The current-voltage characteristics of a pyrogallol-formaldehyde sample without ZrO<sub>2</sub> nanoparticles were studied. These samples, referred to as pristine samples, were found to be more insulating compared to samples doped with 5% ZrO<sub>2</sub> nanoparticles. We also observe that ZrO<sub>2</sub> nanoparticles do not directly contribute to the negative differential resistance (NDR) observed in the I-V curves. As demonstrated in Figure S2 samples

prepared without  $\text{ZrO}_2$  nanoparticles also exhibit NDR. Furthermore, upon Joule heating, we also observed long-lived relaxation effects on the sample conductivity.

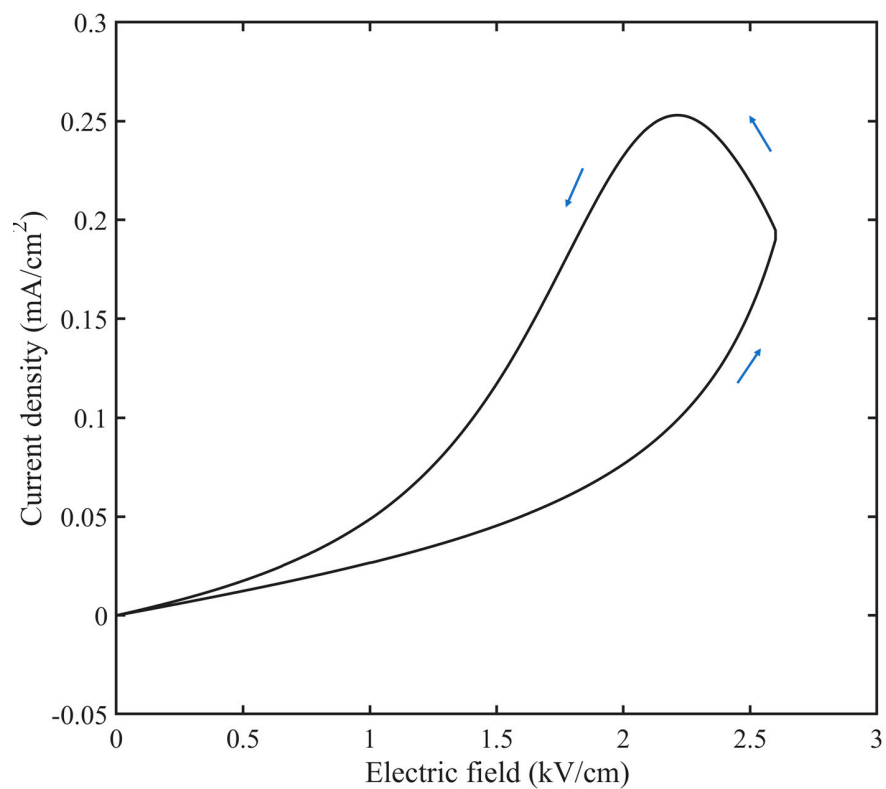

**Figure S2.** Current-voltage characteristics of a pyrogallol-formaldehyde sample without  $\text{ZrO}_2$  nanoparticles. The voltage scan rate was 1 V/s. The sample has an active area of  $0.008 \text{ cm}^2$  and a thickness of 0.05 cm.
